# Supplementary material
Source: Springer Nature journal article supplement (https://www.springermedizin.de/resource/supplementary/13045_2009_44_MOESM8_ESM.pdf/9660540)

1                      2                      3                      4  
Dral:                      -                      +

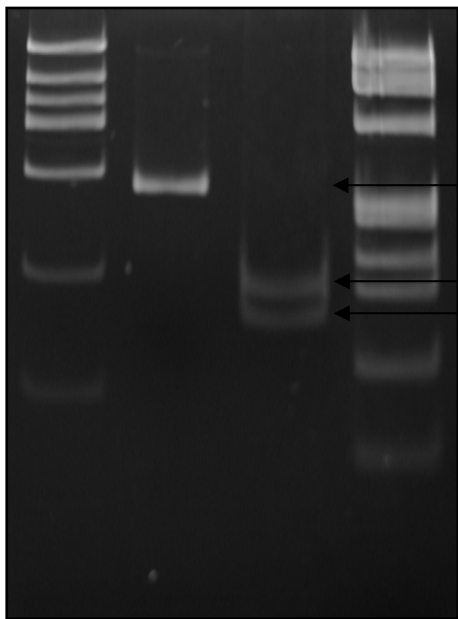

Genotype:                      2-2                      2-2

Supplement: MOESM8 [file 9660540]
